# Supplementary material for: Biomarker and Pharmacologic Evaluation of the γ-Secretase Inhibitor PF-03084014 in Breast Cancer Models
Source: Oxford University Press journal article supplement (doi:10.1158/1078-0432.ccr-12-1379), 2012-07-18
Supplement: 10780432ccr121379-sup-tab3.xls [file 10780432ccr121379-sup-tab3.xls]

## Sheet: Table3S
Table 3S – Description of gene expression experiments from Table 2S for analysis in R
sample	rep	block	Tx	TGI
HBC9	1	1	Vehicle	0
HBC9	2	1	Vehicle	0
HBC9	1	2	PF4014	0
HBC9	2	2	PF4014	0
HBC5	1	3	Vehicle	13
HBC5	2	3	Vehicle	13
HBC5	3	3	Vehicle	13
HBC5	1	4	PF4014	13
HBC5	2	4	PF4014	13
HBC5	3	4	PF4014	13
HCC1937	1	5	Vehicle	24
HCC1937	2	5	Vehicle	24
HCC1937	1	6	PF4014	24
HCC1937	2	6	PF4014	24
HBC17	1	7	Vehicle	29
HBC17	2	7	Vehicle	29
HBC17	1	8	PF4014	29
HBC17	2	8	PF4014	29
HCC1806	1	9	Vehicle	33
HCC1806	3	9	Vehicle	33
HCC1806	1	10	PF4014	33
HCC1806	3	10	PF4014	33
MDAMB361	1	11	Vehicle	34
MDAMB361	2	11	Vehicle	34
SKBR3	1	12	Vehicle	38
SKBR3	2	12	Vehicle	38
SKBR3	1	13	PF4014	38
SKBR3	2	13	PF4014	38
HBC12	1	14	Vehicle	46
HBC12	2	14	Vehicle	46
HBC12	1	15	PF4014	46
HBC12	2	15	PF4014	46
HBC6	1	16	Vehicle	51
HBC6	2	16	Vehicle	51
HBC6	3	16	Vehicle	51
HBC6	2	17	PF4014	51
HBC6	3	17	PF4014	51
SUM149	1	18	Vehicle	51
SUM149	2	18	Vehicle	51
SUM149	1	19	PF4014	51
SUM149	2	19	PF4014	51
MX1	1	20	Vehicle	53
MX1	2	20	Vehicle	53
MX1	1	21	PF4014	53
MX1	2	21	PF4014	53
MDAMB436	1	22	Vehicle	57
MDAMB436	2	22	Vehicle	57
MDAMB436	1	23	PF4014	57
MDAMB436	2	23	PF4014	57
MCF7	1	24	Vehicle	59
MCF7	2	24	Vehicle	59
MCF7	1	25	PF4014	59
MCF7	2	25	PF4014	59
BT474	1	26	Vehicle	70
BT474	2	26	Vehicle	70
MDAMB231luc	1	27	Vehicle	72
MDAMB231luc	2	27	Vehicle	72
MDAMB231luc	1	28	PF4014	72
MDAMB231luc	2	28	PF4014	72
T47D	1	29	Vehicle	84
T47D	2	29	Vehicle	84
T47D	1	30	PF4014	84
T47D	2	30	PF4014	84
HCC1599	1	31	Vehicle	120
HCC1599	2	31	Vehicle	120
HCC1599	1	32	PF4014	120
HCC1599	2	32	PF4014	120
